# Supplementary material for: The Protective Effects of Apigenin Against Radiation‐Induced Intestinal Injury
Source: PubMed Central journal article supplement — Dose Response. 2022 Jul 13;20(3):15593258221113791. doi: 10.1177/15593258221113791 (PMC9289922; doi:10.1177/15593258221113791), 2022-07-13
Supplement: sj-pdf-1-dos-10.1177_15593258221113791.pdf [file sj-pdf-1-dos-10.1177_15593258221113791.pdf]

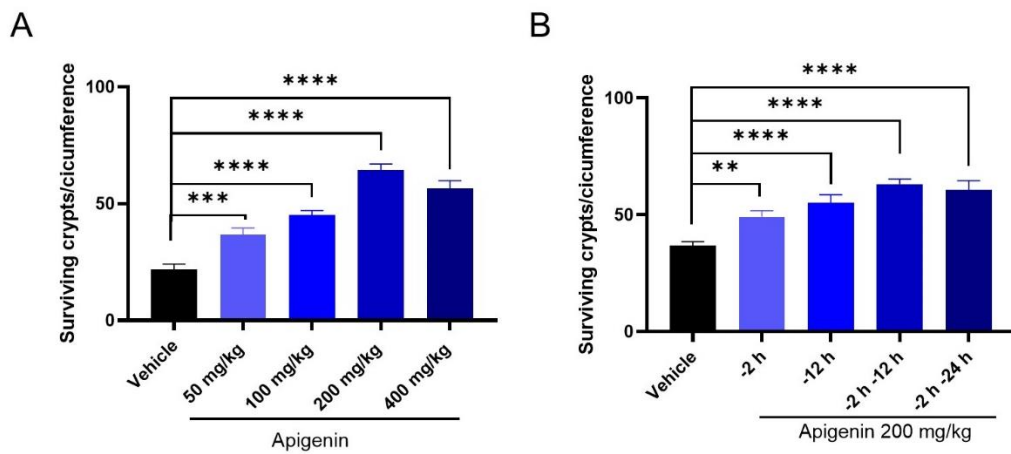

Supplemental Figure 1: Optimal drug dosage and timing of apigenin. (A) Mice were intraperitoneally (*i.p.*) administrated with different concentration of apigenin 12 h and 2 h prior to 10 Gy irradiation. (B) Mice were intraperitoneally (*i.p.*) administrated at different time points of apigenin prior to 10 Gy irradiation. Regenerated crypts per circumference were counted 3.5 d post irradiation (n = 4 mice in each group). Error bars indicate mean  $\pm$  SEM, \*\* $p < 0.01$ , \*\*\* $p < 0.001$ , \*\*\*\* $p < 0.0001$ . Vehicle versus apigenin treatment, by unpaired, two-tailed Student's t-test.

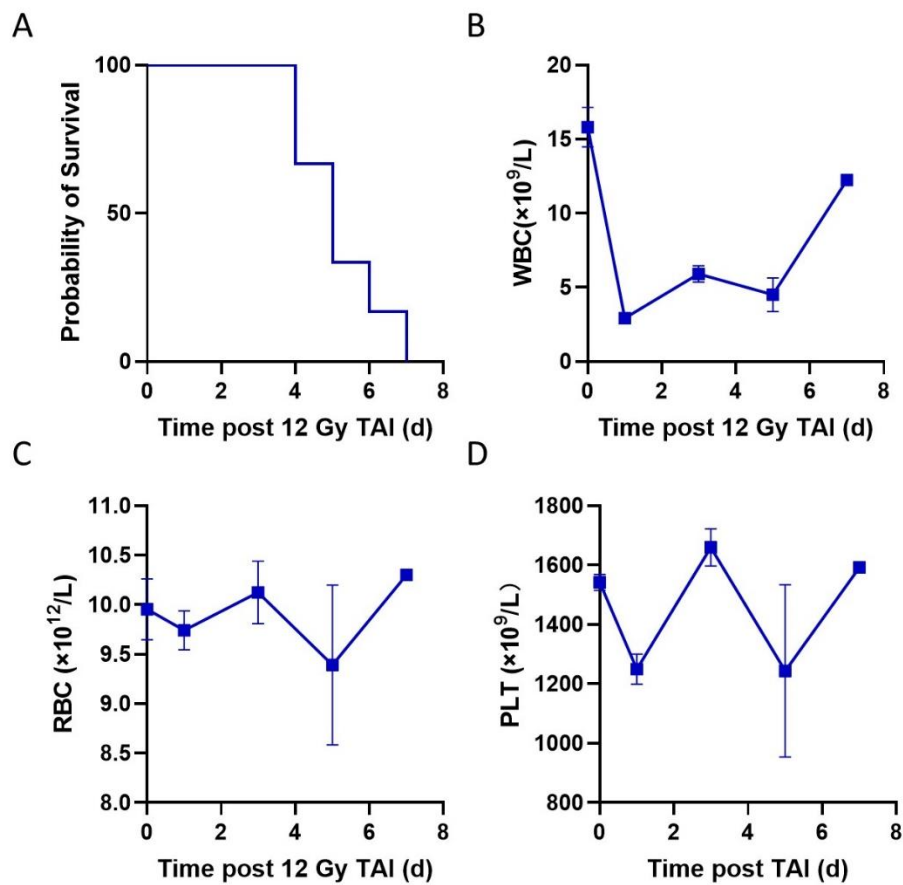

## Supplemental Figure 2

Supplemental Figure 2: Total abdominal irradiation (TAI) in mice dose not induce lethal hematopoietic syndrome. (A) Survival curves of mice after 12 Gy TAI. (B-D) white blood cell (WBC), red blood cell (RBC) and platelet (PLT) were analyzed after 12 Gy TAI. Values are mean  $\pm$  SEM; n = 6 mice per group.
